# Supplementary material
Source: publisher figshare collection journal article supplement (https://rs.figshare.com/ndownloader/files/10290405)
Supplement: Supplementary file 1 [file 10290405]

## Sheet: DATA_GLMM analysis
Dataset-Brahma-Mandal-Gadagkar-2017
nest	indv	initiation	age	db	work	fe
N01	N01SS	1	26	0.12	3	0.24
N01	N01X-	1	17	0.12	6.6	0.12
N01	N01LS	1	NA	4.68	7.8	0.72
N01	N01RR	0	53	0.48	1.32	0
N01	N01-Y	0	53	1.2	3.84	0
N01	N01LO	0	NA	0.48	3.84	0.36
N01	N01LD	0	NA	0.12	1.56	0
N01	N01LX	0	NA	1.2	5.76	0
N01	N01LR	0	31	0.84	5.88	0.12
N01	N01O-	0	9	0.36	1.44	0.12
N01	N01-O	0	NA	1.32	4.92	0.12
N01	N01OO	0	8	0.12	2.28	0.12
N04	N04YD	1	19	0	1.44	0.12
N04	N04-B	1	22	0	1.8	0.12
N04	N04OD	1	14	0	1.8	0.12
N04	N04SL	1	11	3.24	4.08	0.96
N04	N04DX	1	2	0	2.64	0.48
N04	N04DS	1	5	0	4.2	0.96
N04	N04DL	1	5	0	4.08	0.24
N04	N04DO	1	5	0	4.32	0.36
N04	N04DY	1	5	0	2.28	0.72
N04	N04DW	1	3	0	2.88	0.48
N04	N04DR	1	7	1.56	3.84	0.6
N04	N04WY	1	2	0	0.48	0.48
N04	N04-R	0	28	0	0.84	0
N04	N04LS	0	27	0.24	3.84	0
N04	N04O-	0	49	0	2.28	0
N04	N04BR	0	NA	0	1.44	0
N04	N04WR	0	2	0	4.56	0.72
N06	N06R-	1	2	0	0.96	0.72
N06	N06-Y	1	46	2.4	5.04	0.72
N06	N06YY	1	6	0	1.44	0.96
N06	N06YL	1	23	0	1.68	0.12
N06	N06YO	1	21	0	2.04	0.12
N06	N06YS	1	18	0	0.12	0.96
N06	N06YX	1	23	0	0.84	0.96
N06	N06LX	1	10	0	6.72	0.12
N06	N06LO	1	19	0.12	1.08	0.12
N06	N06LW	1	11	0	5.88	0.96
N06	N06LR	1	18	0.24	1.92	0.12
N06	N06LD	1	14	0.36	3.72	0.96
N06	N06LY	1	19	2.28	3.36	0.24
N06	N06OR	1	7	0.84	3.96	0.72
N06	N06OS	1	9	1.08	5.16	0.84
N06	N06OX	1	NA	0	1.8	0.12
N06	N06SB	1	NA	1.68	2.88	0.12
N06	N06SY	1	NA	0.48	6.72	0.96
N06	N06S-	1	27	0.6	1.56	0.24
N06	N06SR	1	20	0.24	4.2	0.6
N06	N06-W	1	NA	5.88	2.28	0.12
N06	N06X-	1	23	0.36	2.64	0.24
N06	N06-X	1	4	0	0.32	0.32
N06	N06XX	1	21	0	0.84	0.96
N06	N06RO	0	23	0.12	1.2	0.12
N06	N06RS	0	23	0	1.08	0
N06	N06YR	0	23	0.36	4.56	0.24
N06	N06L-	0	43	0	0.6	0
N06	N06LS	0	11	0.12	5.52	0.48
N06	N06OY	0	7	0	1.2	0.96
N06	N06OL	0	NA	2.4	7.2	0.96
N06	N06OB	0	9	0.12	1.8	0.6
N06	N06SO	0	5	0.12	0.84	0.36
N06	N06SL	0	NA	1.68	4.44	0.24
N06	N06D-	0	24	0.36	3.12	0.12
N06	N06-D	0	21	0.12	1.44	0.24
N06	N06DD	0	25	0	3.12	0.12
N07	N07BB	1	25	0	0.24	0.12
N07	N07BO	1	16	0.24	0.72	0.12
N07	N07LY	1	5	0	6.72	0.72
N07	N07LO	1	2	0	1.68	0.48
N07	N07R-	0	34	0.24	3.84	0
N07	N07RB	0	16	0.48	2.88	0
N07	N07Y-	0	33	0	1.92	0
N07	N07YB	0	NA	0.48	4.08	0.24
N07	N07YO	0	NA	0	5.52	0.72
N07	N07YW	0	NA	0.48	4.8	0
N07	N07-B	0	27	0	0.72	0
N07	N07BR	0	13	0.24	2.88	0
N07	N07BS	0	17	0	3.84	0
N07	N07BD	0	13	0	0.24	0
N07	N07L-	0	32	0	0	0
N07	N07LL	0	32	0.72	5.76	0.48
N07	N07S-	0	32	9.6	9.6	0.24
N07	N07-X	0	23	0	0	0
N11	N11SS	1	58	0	6.96	0.96
N11	N11-Y	0	61	0.24	9.36	0.96
N11	N11-O	0	54	0.96	8.88	1.2
N11	N11S-	0	41	0.48	6.96	0.96
N11	N11G-	0	NA	0	7.92	1.2
N11	N11-G	0	NA	0	3.36	0
N11	N11GG	0	NA	0	7.92	1.2
N11	N11D-	0	NA	0.48	7.68	1.2
N11	N11-D	0	NA	0	7.68	0.96
N12	N12R-	1	NA	0	0	0.12
N12	N12-R	1	25	0	0	0.96
N12	N12L-	1	NA	4.8	2.4	0.24
N12	N12SR	1	NA	0	1.92	1.2
N12	N12SX	1	NA	0.24	2.4	0.24
N12	N12RB	0	NA	0.24	2.4	0
N12	N12RL	0	NA	0.24	0.72	0
N12	N12RX	0	25	0	3.36	0
N12	N12YS	0	NA	4.56	5.52	0
N12	N12BS	0	12	0.24	3.12	0
N12	N12BW	0	13	0	0.96	0
N12	N12BX	0	14	0	2.4	0.24
N12	N12LW	0	14	0	0	0
N12	N12S-	0	NA	0.72	0.72	0
N12	N12SB	0	NA	0	0.48	0
N12	N12SD	0	NA	0	0.72	0.24
N12	N12SW	0	NA	0.24	2.88	0
N12	N12G-	0	NA	6.24	7.92	0
N12	N12-G	0	NA	0	0	0
N12	N12GG	0	NA	0	0	0
N12	N12D-	0	NA	0.24	4.08	0
N12	N12-D	0	NA	0.96	0.24	0
N12	N12DD	0	30	0.24	0.24	0
N12	N12-W	0	NA	0.72	4.08	0

## Sheet: age
age.ini	age.non.ini
26	53
17	53
19	31			.ini are the wasps that initiated nests and laid eggs
22	9			.non.ini are the wasps that died without initiating nests
14	8
11	28
2	19
5	27
5	49
5	2
5	23
3	23
7	23
2	43
2	11
46	7
6	31
23	9
21	5
18	24
23	21
10	25
19	34
11	16
18	20
14	16
19	33
7	27
9	13
27	17
20	17
23	13
21	32
4	32
25	32
16	23
5	23
2	61
58	51
25	54
	41
	25
	12
	13
	14
	14
	30

## Sheet: fe
fe.ini	fe.non.ini
0	0
0.12	0
0.12	0.36
0.12	0			.ini are the wasps that initiated nests and laid eggs
0.36	0			.non.ini are the wasps that died without initiating nests
0.12	0.12
0.24	0.12
0.48	0.12
0.96	0.12
0.72	0
0.36	0
0.24	0
0.48	0
0.6	0.72
0.24	0.12
0	0
0.72	0.24
0.12	0
0.12	0.48
0	0.96
0	0.96
0	0.6
0.12	0.36
0.12	0.24
0.96	0.12
0	0.24
0.12	0.12
0.24	0
0.72	0
0.84	0
0.12	0.24
0.12	0.72
0.6	0
0.6	0
0.6	0
0.12	0
0.24	0
0.32	0
0.24	0.48
0	0.24
0	0
0.72	0.96
0.48	1.2
1.92	0.96
0	1.2
0	0
0.24	1.2
1.2	1.2
1.68	0.96
	0
	0
	0
	0
	0
	0
	0.24
	0
	0
	0
	0.24
	0
	0
	0
	0
	0
	0
	0
	0

## Sheet: work
work.ini	work.non.ini
3	1.32
6.6	3.84
7.8	3.84
1.44	1.56			.ini are the wasps that initiated nests and laid eggs
1.8	5.76			.non.ini are the wasps that died without initiating nests
1.8	5.88
4.08	1.44
2.64	4.92
4.2	2.28
4.08	0.84
4.32	3.84
2.28	2.28
2.88	1.44
3.84	4.56
0.48	1.2
0.96	1.08
5.04	4.56
1.44	0.6
1.68	5.52
2.04	1.2
0.12	7.2
0.84	1.8
6.72	0.84
1.08	4.44
5.88	3.12
1.92	1.44
3.72	3.12
3.36	3.84
3.96	2.88
5.16	1.92
1.8	4.08
2.88	5.52
6.72	4.8
1.56	0.72
4.2	2.88
2.28	3.84
2.64	0.24
0.32	0
0.84	5.76
0.24	9.6
0.72	0
6.72	9.36
1.68	8.88
6.96	6.96
0	7.92
0	3.36
2.4	7.92
1.92	7.68
2.4	7.68
	2.4
	0.72
	3.36
	5.52
	3.12
	0.96
	2.4
	0
	0.72
	0.48
	0.72
	2.88
	7.92
	0
	0
	4.08
	0.24
	0.24
	4.08

## Sheet: db
db.ini	db.non.ini
0.12	0.48
0.12	1.2
4.68	0.48
0	0.12			.ini are the wasps that initiated nests and laid eggs
0	1.2			.non.ini are the wasps that died without initiating nests
0	0.84
3.24	0.36
0	1.32
0	0.12
0	0
0	0.24
0	0
0	0
1.56	0
0	0.12
0	0
2.4	0.36
0	0
0	0.12
0	0
0	2.4
0	0.12
0	0.12
0.12	1.68
0	0.36
0.24	0.12
0.36	0
2.28	0.24
0.84	0.48
1.08	0
0	0.48
1.68	0
0.48	0.48
0.6	0
0.24	0.24
5.88	0
0.36	0
0	0
0	0.72
0	9.6
0.24	0
0	0.24
0	0.96
0	0.48
0	0
0	0
4.8	0
0	0.48
0.24	0
	0.24
	0.24
	0
	4.56
	0.24
	0
	0
	0
	0.72
	0
	0
	0.24
	6.24
	0
	0
	0.24
	0.96
	0.24
	0.72
